# Supplementary material
Source: PubMed Central journal article supplement (PMC7578358)
Supplement: joces-133-246363-s1.pdf [file joces-133-246363-s1.pdf]

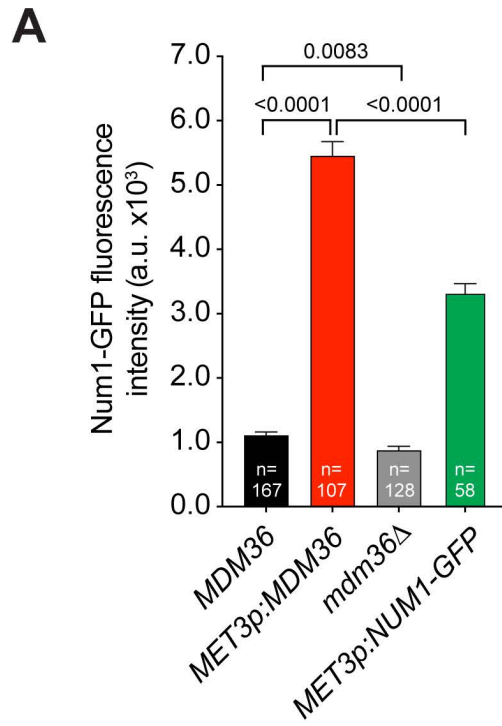

**B**

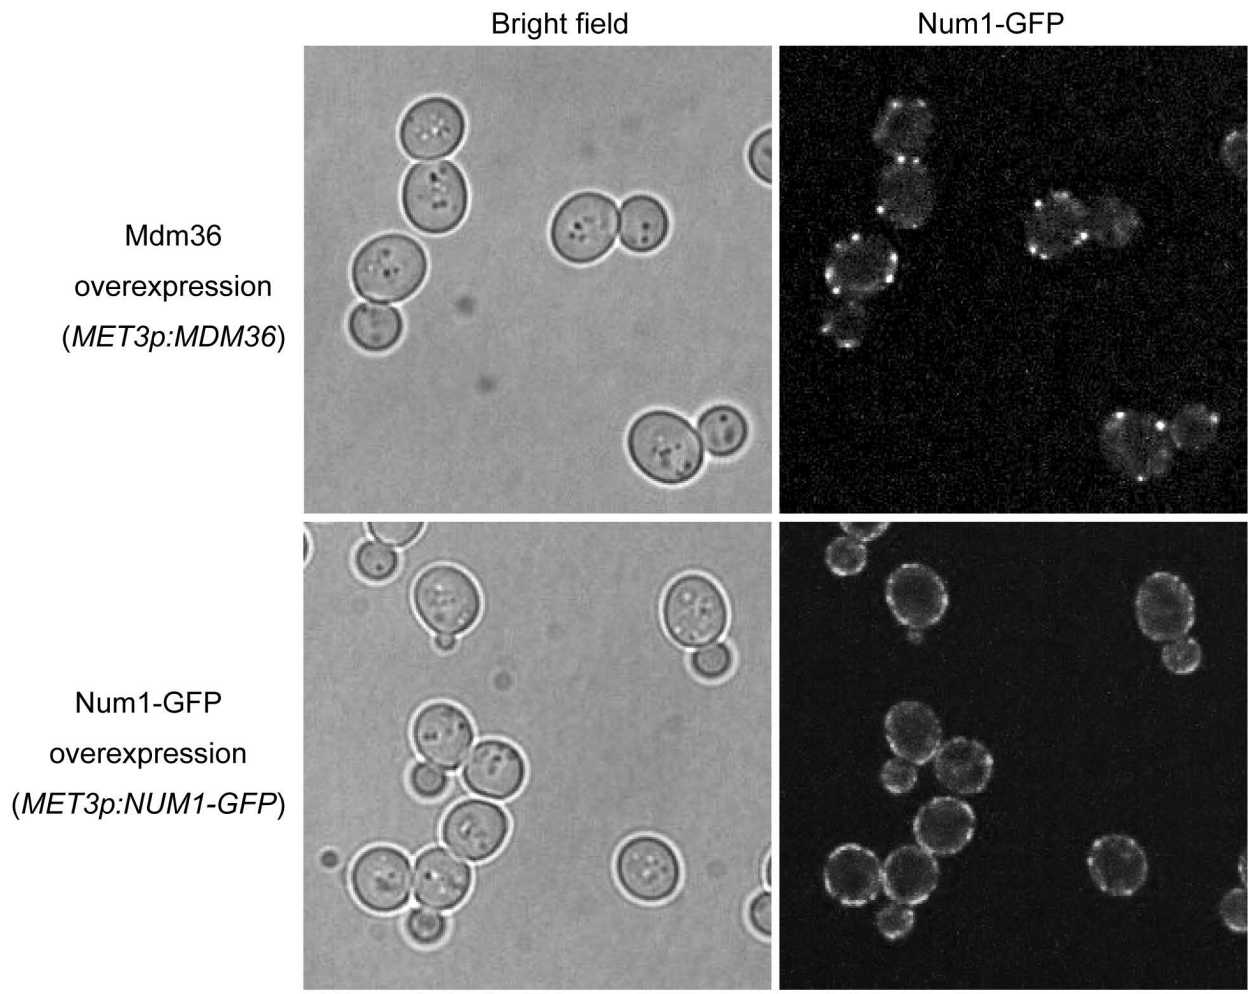

**Figure S1. Mdm36 promotes Num1 clustering.** (A) Mean fluorescence intensity of individual Num1-GFP patches in indicated strains. Error bars represent SEM. *P*-value by unpaired *t* test. (B) Bright field and confocal images of cells overexpressing Mdm36 or Num1-GFP. Each confocal image is a maximum intensity projection of four optical sections spaced 0.2  $\mu\text{m}$  apart from the equator of cells.

**A**

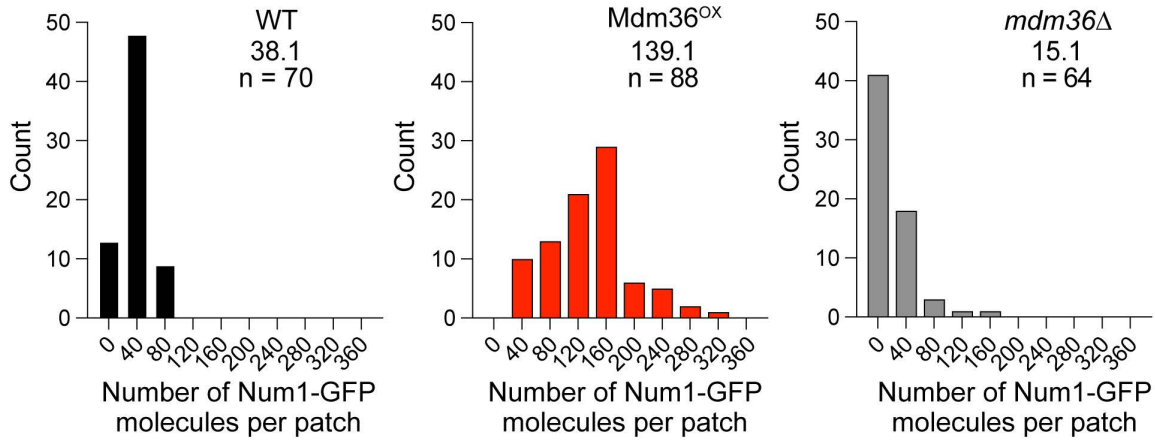

**B**

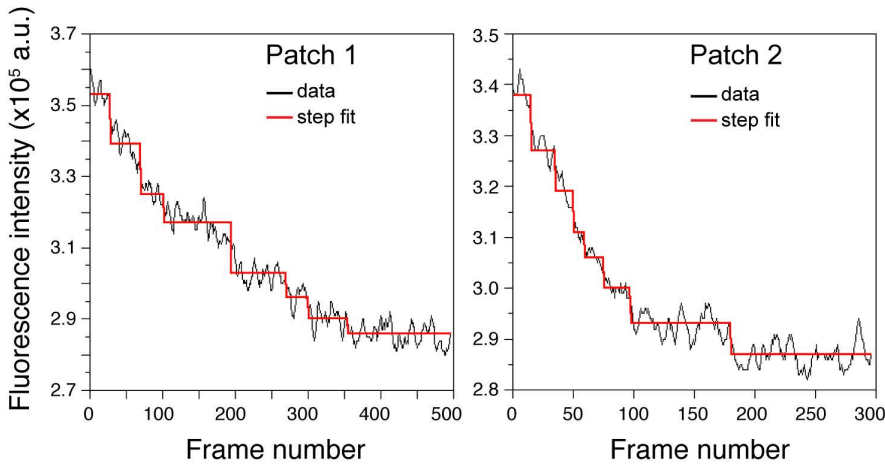

**C**

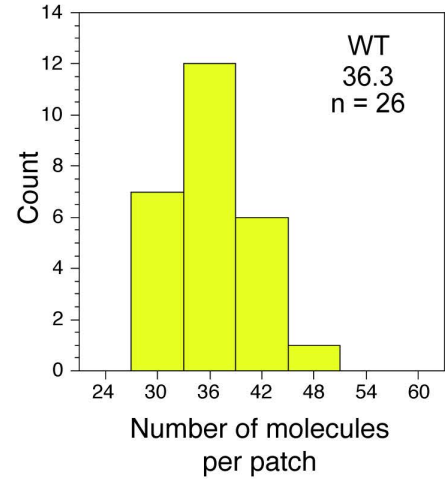

**D**

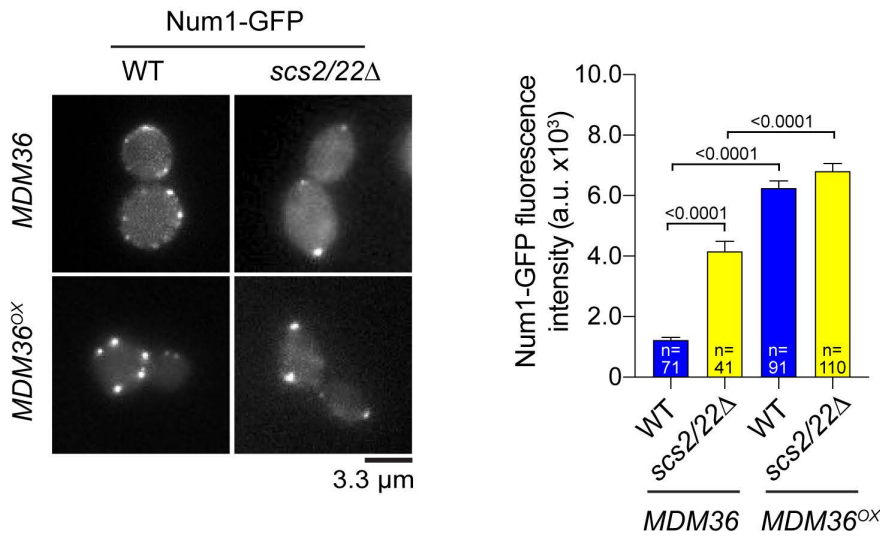

**Figure S2. Copy number of Num1-GFP molecules per cortical patch.** (A) Histogram of protein copy number determined by ratiometric comparison to Mif2-GFP standard. Median copy number shown for each strain. (B) Representative data for bleaching step analysis. WT cells expressing Num1-GFP were imaged continuously in a single focal plane with a 250-ms exposure for each frame. Intensities of individual Num1-GFP patches were quantified over the course of the fluorescence decay, filtered by a five-frame rolling average, and analyzed by STEPFINDER to detect bleaching steps. Plots show filtered intensity traces (black) along with step fits obtained from STEPFINDER (red). (C) Histogram of protein copy number estimated by bleaching step analysis. Median copy number per cortical patch for Num1-GFP in WT cells is shown. **Num1 redistributes to bud tip and mother apex in Mdm36<sup>OX</sup> cells lacking Scs2 and Scs22.** (D) Wide-field images of Num1-GFP in WT and *scs2/22Δ* cells with and without Mdm36 overexpression. Each image is a maximum intensity projection of five optical sections spaced 0.5 μm apart. Plot showing mean fluorescence intensity of individual Num1-GFP patches in indicated strains. Error bar represents SEM. *P*-value by one-way ANOVA test.

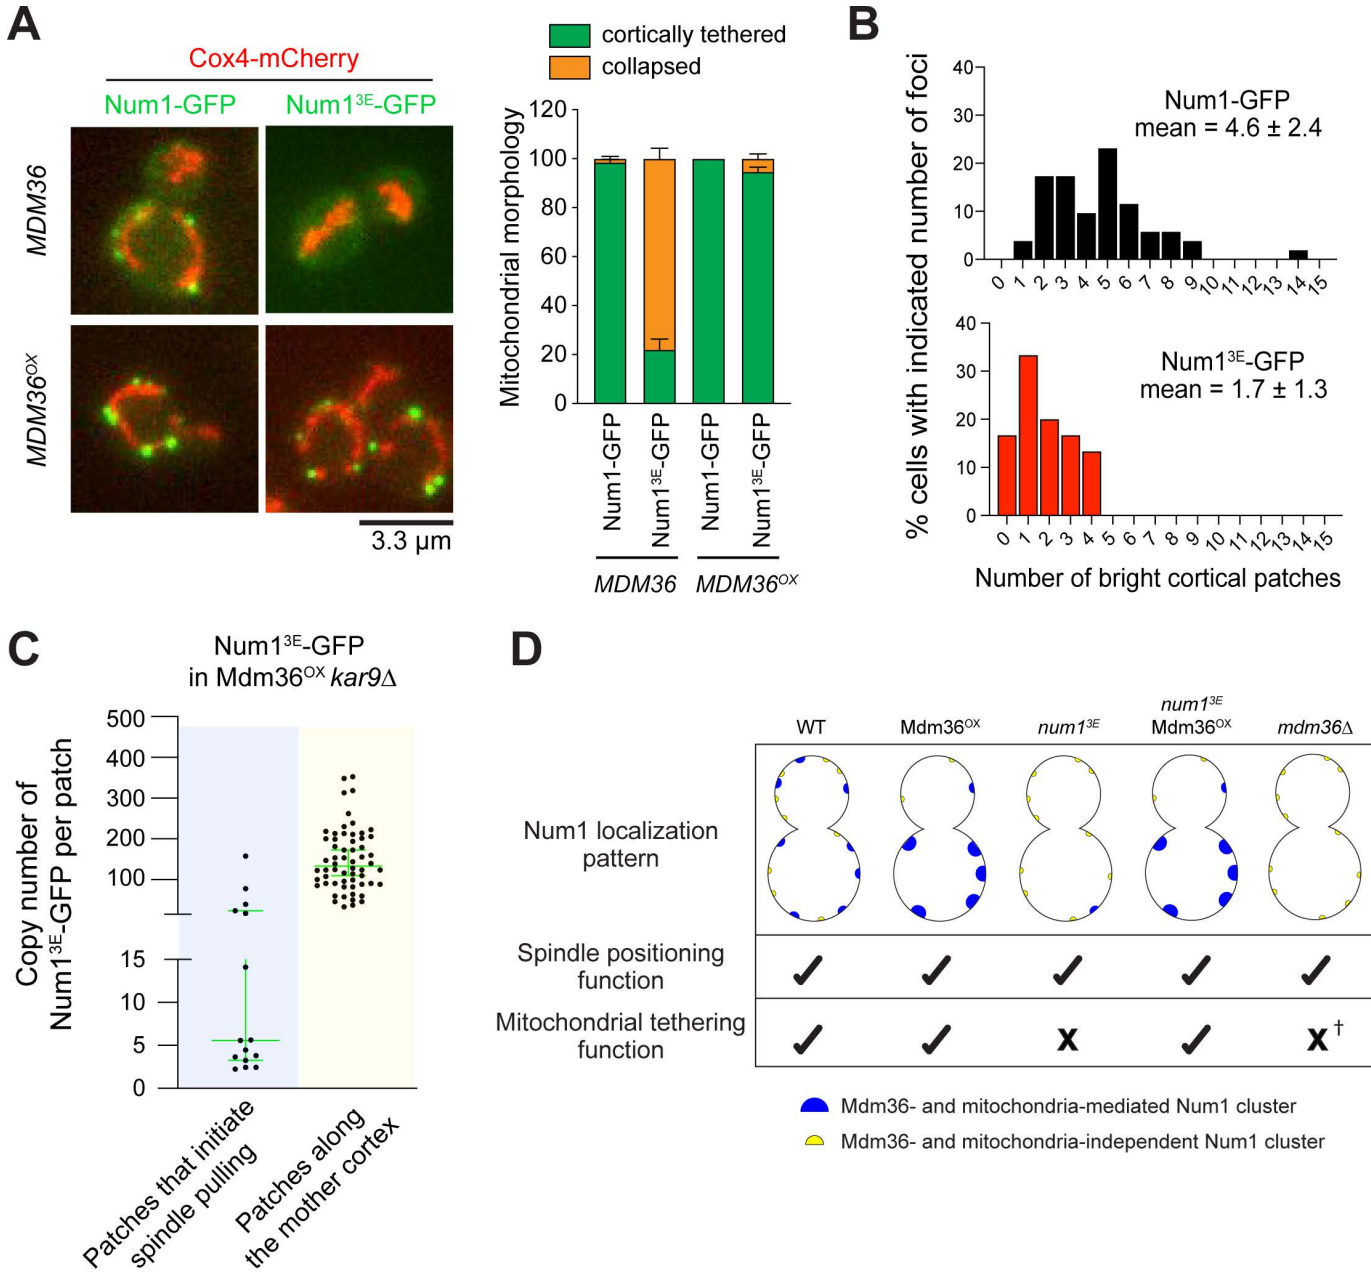

**Figure S3. 3E mutations disrupt mitochondrial tethering but not spindle positioning**

**function of Num1.** (A) Wide-field images of Cox4-mCherry cells expressing Num1-GFP and Num1<sup>3E</sup>-GFP with and without Mdm36 overexpression. *Right*, quantification of mitochondrial morphology in indicated strains. Mitochondrial network is considered collapsed if the network

fails to show tubular morphology and appears meshed or aggregated over the course of a 4-min movie. Error bars represent SEP.  $91 \leq n \leq 131$  cells per strain. (B) Percentage of Num1-GFP and Num1<sup>3E</sup>-GFP cells with indicated number of cortical patches ( $30 \leq n \leq 52$  cells). Mean number per cell  $\pm$  SD is indicated. (C) Copy number of Num1<sup>3E</sup>-GFP at individual cortical patches found along the mother cell cortex compared to those found in the bud cortex mediating spindle pulling during a spindle correction assay in Mdm36<sup>OX</sup> *kar9* $\Delta$  cells ( $n = 60$  and  $15$  patches, respectively). Median  $\pm$  95% confidence interval is indicated. (D) Graphical summary of Num1 localization pattern and the resultant spindle positioning and mitochondrial tethering function in the indicated strain backgrounds. †, based on mitochondrial phenotype of *mdm36* $\Delta$  (Hammermeister et al., 2010).

**Table S1.** Yeast strains used in this study

| Strain  | Genotype                                                                                                                                                    | Source            |
|---------|-------------------------------------------------------------------------------------------------------------------------------------------------------------|-------------------|
| YWL706  | <i>MATα NUM1-yEGFP::spHIS5 ura3-52 lys2-801 leu2-Δ1 his3-Δ200 trp1-Δ63</i>                                                                                  | Omer et al., 2018 |
| YWL4774 | <i>MATα NUM1-yEGFP::spHIS5 HIS3p:mRuby2-TUB1+3'UTR::HPH<sup>R</sup> ura3-52 lys2-801 leu2-Δ1 his3-Δ200 trp1-Δ63</i>                                         | Omer et al., 2018 |
| YWL4959 | <i>MATα num1<sup>L167E+L170E</sup>-yEGFP::spHIS5 HIS3p:mRuby2-TUB1+3'UTR::URA3 ura3-52 lys2-801 leu2-Δ1 his3-Δ200 trp1-Δ63</i>                              | Omer et al., 2018 |
| YWL4966 | <i>MATα NUM1-yEGFP::spHIS5 kar9Δ::KAN<sup>R</sup> HIS3p:mRuby2-TUB1+3'UTR::URA3 ura3-52 lys2-801 leu2-Δ1 his3-Δ200 trp1-Δ63</i>                             | Omer et al., 2018 |
| YWL5664 | <i>MATα NUM1-yEGFP::spHIS5 HPH<sup>R</sup>::MET3p:MDM36 ura3-52 lys2-801 leu2-Δ1 his3-Δ200 trp1-Δ63</i>                                                     | This study        |
| YWL4792 | <i>MATα mdm36Δ::KAN<sup>R</sup> NUM1-yEGFP::spHIS5 ura3-52 lys2-801 leu2-Δ1 his3-Δ200 trp1-Δ63</i>                                                          | This study        |
| YWL4879 | <i>MATα mdm36Δ::KAN<sup>R</sup> NUM1-yEGFP::spHIS5 HIS3p:mRuby2-TUB1+3'UTR::URA3 ura3-52 lys2-801 leu2-Δ1 his3-Δ200 trp1-Δ63</i>                            | This study        |
| YWL5685 | <i>MATα NUM1-yEGFP::spHIS5 HPH<sup>R</sup>::MET3p:MDM36 HIS3p:mRuby2-TUB1+3'UTR::URA3 ura3-52 lys2-801 leu2-Δ1 his3-Δ200 trp1-Δ63</i>                       | This study        |
| YWL4135 | <i>MATα DYN1-3GFP::TRP1 mCherry-TUB1::LEU2 ura3-52 lys2-801 leu2-Δ1 his3-Δ200 trp1-Δ63</i>                                                                  | This study        |
| YWL5682 | <i>MATα DYN1-3GFP::TRP1 HPH<sup>R</sup>::MET3p:MDM36 HIS3p:mRuby2-TUB1+3'UTR::URA3 ura3-52 lys2-801 leu2-Δ1 his3-Δ200 trp1-Δ63</i>                          | This study        |
| YWL2076 | <i>MATα JNM1-3mCherry::HIS3 GFP-TUB1::LEU2 ura3-52 lys2-801 leu2-Δ1 his3-Δ200 trp1-Δ63</i>                                                                  | Tang et al., 2012 |
| YWL5673 | <i>MATα JNM1-3mCherry::HIS3 GFP-TUB1::LEU2 HPH<sup>R</sup>::MET3p:MDM36 ura3-52 lys2-801 leu2-Δ1 his3-Δ200 trp1-Δ63</i>                                     | This study        |
| YWL5685 | <i>MATα NUM1-yEGFP::spHIS5 HPH<sup>R</sup>::MET3p:MDM36 HIS3p:mRuby2-TUB1+3'UTR::URA3 ura3-52 lys2-801 leu2-Δ1 his3-Δ200 trp1-Δ63</i>                       | This study        |
| YWL4959 | <i>MATα num1<sup>L167E+L170E</sup>-yEGFP::spHIS5 HIS3p:mRuby2-TUB1+3'UTR::URA3 ura3-52 lys2-801 leu2-Δ1 his3-Δ200 trp1-Δ63</i>                              | Omer et al., 2018 |
| YWL5694 | <i>MATα num1<sup>L167E+L170E</sup>-yEGFP::spHIS5 HPH<sup>R</sup>::MET3p:MDM36 HIS3p:mRuby2-TUB1+3'UTR::URA3 ura3-52 lys2-801 leu2-Δ1 his3-Δ200 trp1-Δ63</i> | This study        |
| YWL4966 | <i>MATα NUM1-yEGFP::spHIS5 kar9Δ::KAN<sup>R</sup> HIS3p:mRuby2-TUB1+3'UTR::URA3 ura3-52 lys2-801 leu2-Δ1 his3-Δ200 trp1-Δ63</i>                             | Omer et al., 2018 |
| YWL5667 | <i>MATα NUM1-yEGFP::spHIS5 kar9Δ::KAN<sup>R</sup> HPH<sup>R</sup>::MET3p:MDM36 HIS3p:mRuby2-</i>                                                            | This study        |

|         |                                                                                                                                                                               |                   |
|---------|-------------------------------------------------------------------------------------------------------------------------------------------------------------------------------|-------------------|
|         | <i>TUB1+3'UTR::URA3 ura3-52 lys2-801 leu2-Δ1 his3-Δ200 trp1-Δ63</i>                                                                                                           |                   |
| YWL5724 | <i>MATa num1<sup>K121E+R262E+R265E</sup>-yEGFP::spHIS5 ura3-52 lys2-801 leu2-Δ1 his3-Δ200 trp1-Δ63</i>                                                                        | This study        |
| YWL2572 | <i>MATa NUM1-yEGFP::spHIS5 COX4-mCherry::URA3 ura3-52 lys2-801 leu2-Δ1 his3-Δ200 trp1-Δ63</i>                                                                                 | Omer et al., 2018 |
| YWL5740 | <i>MATa num1<sup>K121E+R262E+R265E</sup>-yEGFP::spHIS5 COX4-mCherry::URA3 ura3-52 lys2-801 leu2-Δ1 his3-Δ200 trp1-Δ63</i>                                                     | This study        |
| YWL5760 | <i>MATa num1<sup>K121E+R262E+R265E</sup>-yEGFP::spHIS5 COX4-mCherry::URA3 HPH<sup>R</sup>::MET3p:MDM36 ura3-52 lys2-801 leu2-Δ1 his3-Δ200 trp1-Δ63</i>                        | This study        |
| YWL488  | <i>MATa kar9Δ::TRP1 ura3-52 lys2-801 leu2-Δ1 his3-Δ200 trp1-Δ63</i>                                                                                                           | This study        |
| YWL484  | <i>MATa kar9Δ::TRP1 ura3-52 lys2-801 leu2-Δ1 his3-Δ200 trp1-Δ63</i>                                                                                                           | Tang et al., 2009 |
| YWL3784 | <i>MATa num1<sup>L167E+L170E</sup>::LEU2 ura3-52 lys2-801 leu2-Δ1 his3-Δ200 trp1-Δ63</i>                                                                                      | This study        |
| YWL5659 | <i>MATa mdm36Δ::KAN<sup>R</sup> ura3-52 lys2-801 leu2-Δ1 his3-Δ200 trp1-Δ63</i>                                                                                               | This study        |
| YWL5656 | <i>MATa kar9Δ::TRP1 ura3-52 lys2-801 leu2-Δ1 his3-Δ200 trp1-Δ63</i>                                                                                                           | This study        |
| YWL5670 | <i>MATa HPH<sup>R</sup>::MET3p:MDM36 ura3-52 lys2-801 leu2-Δ1 his3-Δ200 trp1-Δ63</i>                                                                                          | This study        |
| YWL5671 | <i>MATa HPH<sup>R</sup>::MET3p:MDM36 ura3-52 lys2-801 leu2-Δ1 his3-Δ200 trp1-Δ63</i>                                                                                          | This study        |
| YWL5715 | <i>MATa NUM1-yEGFP::spHIS5 COX4-mCherry::URA3 HPH<sup>R</sup>::MET3p:MDM36 ura3-52 lys2-801 leu2-Δ1 his3-Δ200 trp1-Δ63</i>                                                    | This study        |
| YWL5714 | <i>MATa NUM1-yEGFP::spHIS5 COX4-mCherry::URA3 HPH<sup>R</sup>::MET3p:MDM36 ura3-52 lys2-801 leu2-Δ1 his3-Δ200 trp1-Δ63</i>                                                    | This study        |
| YWL4834 | <i>MATa NUM1-yEGFP::spHIS5 mdm36Δ::KAN<sup>R</sup> COX4-mCherry::URA3 ura3-52 lys2-801 leu2-Δ1 his3-Δ200 trp1-Δ63</i>                                                         | This study        |
| YWL5737 | <i>MATa num1<sup>K121E+R262E+R265E</sup>-yEGFP::spHIS5 HIS3p:mRuby2-TUB1+3'UTR::URA3 ura3-52 lys2-801 leu2-Δ1 his3-Δ200 trp1-Δ63</i>                                          | This study        |
| YWL5763 | <i>MATa num1<sup>K121E+R262E+R265E</sup>-yEGFP::spHIS5 HIS3p:mRuby2-TUB1+3'UTR::URA3 kar9Δ::TRP1 ura3-52 lys2-801 leu2-Δ1 his3-Δ200 trp1-Δ63</i>                              | This study        |
| YWL5758 | <i>MATa num1<sup>K121E+R262E+R265E</sup>-yEGFP::spHIS5 HIS3p:mRuby2-TUB1+3'UTR::URA3 HPH<sup>R</sup>::MET3p:MDM36 ura3-52 lys2-801 leu2-Δ1 his3-Δ200 trp1-Δ63</i>             | This study        |
| YWL5765 | <i>MATa num1<sup>K121E+R262E+R265E</sup>-yEGFP::spHIS5 HIS3p:mRuby2-TUB1+3'UTR::URA3 HPH<sup>R</sup>::MET3p:MDM36 kar9Δ::TRP1 ura3-52 lys2-801 leu2-Δ1 his3-Δ200 trp1-Δ63</i> | This study        |



|         |                                                                                                                                                                     |                   |
|---------|---------------------------------------------------------------------------------------------------------------------------------------------------------------------|-------------------|
| YWL3955 | <i>MATa cin8Δ::spHIS5 GFP-TUB1::LEU2 ura3-52 lys2-801 leu2-Δ1 his3-Δ200 trp1-Δ63</i>                                                                                | Omer et al., 2018 |
| YWL5670 | <i>MATa HPH<sup>R</sup>::MET3p:MDM36 ura3-52 lys2-801 leu2-Δ1 his3-Δ200 trp1-Δ63</i>                                                                                | This study        |
| YWL5722 | <i>MATa HPH<sup>R</sup>::MET3p:NUM1-yEGFP::spHIS5 COX4-mCherry::URA3 ura3-52 lys2-801 leu2-Δ1 his3-Δ200 trp1-Δ63</i>                                                | This study        |
| YWL4764 | <i>MATa NUM1-yEGFP::spHIS5 scs2Δ::TRP1 scs22Δ::KAN<sup>R</sup> ura3-52 lys2-801 leu2-Δ1 his3-Δ200 trp1-Δ63</i>                                                      | Omer et al., 2018 |
| YWL5984 | <i>MATa NUM1-yEGFP::spHIS5 scs2Δ::TRP1 scs22Δ::KAN<sup>R</sup> HPH<sup>R</sup>::MET3p:MDM36 ura3-52 lys2-801 leu2-Δ1 his3-Δ200 trp1-Δ63</i>                         | This study        |
| YWL6002 | <i>MATa NUM1-yEGFP::spHIS5 COX4-mCherry::URA3 kar9Δ::TRP1 HPH<sup>R</sup>::MET3p:MDM36 HIS3p:Venus-TUB1+3'UTR::LEU2 ura3-52 lys2-801 leu2-Δ1 his3-Δ200 trp1-Δ63</i> | This study        |
| YWL1124 | <i>MATa CSE4-yEGFP::spHIS5 ura3-52 lys2-801 leu2-Δ1 his3-Δ200 trp1-Δ63</i>                                                                                          | This study        |
| YWL6058 | <i>MATa NUM1-yEGFP::spHIS5 kar9Δ::KAN<sup>R</sup> MET3p:mRuby2-MDM36::LEU2 HIS3p:Venus-TUB1+3'UTR::TRP1 ura3-52 lys2-801 leu2-Δ1 his3-Δ200 trp1-Δ63</i>             | This study        |
| YWL6056 | <i>MATa NUM1-yEGFP::spHIS5 kar9Δ::KAN<sup>R</sup> MET3p:mRuby2-MDM36::LEU2 HIS3p:Venus-TUB1+3'UTR::TRP1 ura3-52 lys2-801 leu2-Δ1 his3-Δ200 trp1-Δ63</i>             | This study        |
| YWL5767 | <i>MATa NUM1-mRuby3::KAN<sup>R</sup> HPH<sup>R</sup>::MET3p:MDM36 DYN1-3GFP::TRP1 ura3-52 lys2-801 leu2-Δ1 his3-Δ200 trp1-Δ63</i>                                   | This study        |
| YWL5225 | <i>MATa NUM1-yEGFP::spHIS5 mdm36Δ::KAN<sup>R</sup> COX4-mCherry::URA3 MET3p:MDM36::LEU2 ura3-52 lys2-801 leu2-Δ1 his3-Δ200 trp1-Δ63</i>                             | This study        |
| YWL5796 | <i>MATa DYN1-3GFP::TRP1 COX4-mCherry::URA3 HPH<sup>R</sup>::MET3p:MDM36 ura3-52 lys2-801 leu2-Δ1 his3-Δ200 trp1-Δ63</i>                                             | This study        |
| YWL4879 | <i>MATa mdm36Δ::KAN<sup>R</sup> NUM1-yEGFP::spHIS5 HIS3p:mRuby2-TUB1+3'UTR::URA3 ura3-52 lys2-801 leu2-Δ1 his3-Δ200 trp1-Δ63</i>                                    | This study        |
| YWL5473 | <i>MATa mdm36Δ::KAN<sup>R</sup> kar9Δ::TRP1 NUM1-yEGFP::spHIS5 HIS3p:mRuby2-TUB1+3'UTR::URA3 ura3-52 lys2-801 leu2-Δ1 his3-Δ200 trp1-Δ63</i>                        | This study        |
| YWL6127 | <i>MATa DYN1-3GFP::TRP1 num1<sup>L167E+L170E</sup>::LEU2 HPH<sup>R</sup>::MET3p:MDM36 HIS3p:mRuby2-TUB1+3'UTR::URA3 ura3-52 lys2-801 leu2-Δ1 his3-Δ200 trp1-Δ63</i> | This study        |
| YWL6128 | <i>MATa MIF2-yEGFP::spHIS5 ura3-52 lys2-801 leu2-Δ1 his3-Δ200 trp1-Δ63</i>                                                                                          | This study        |

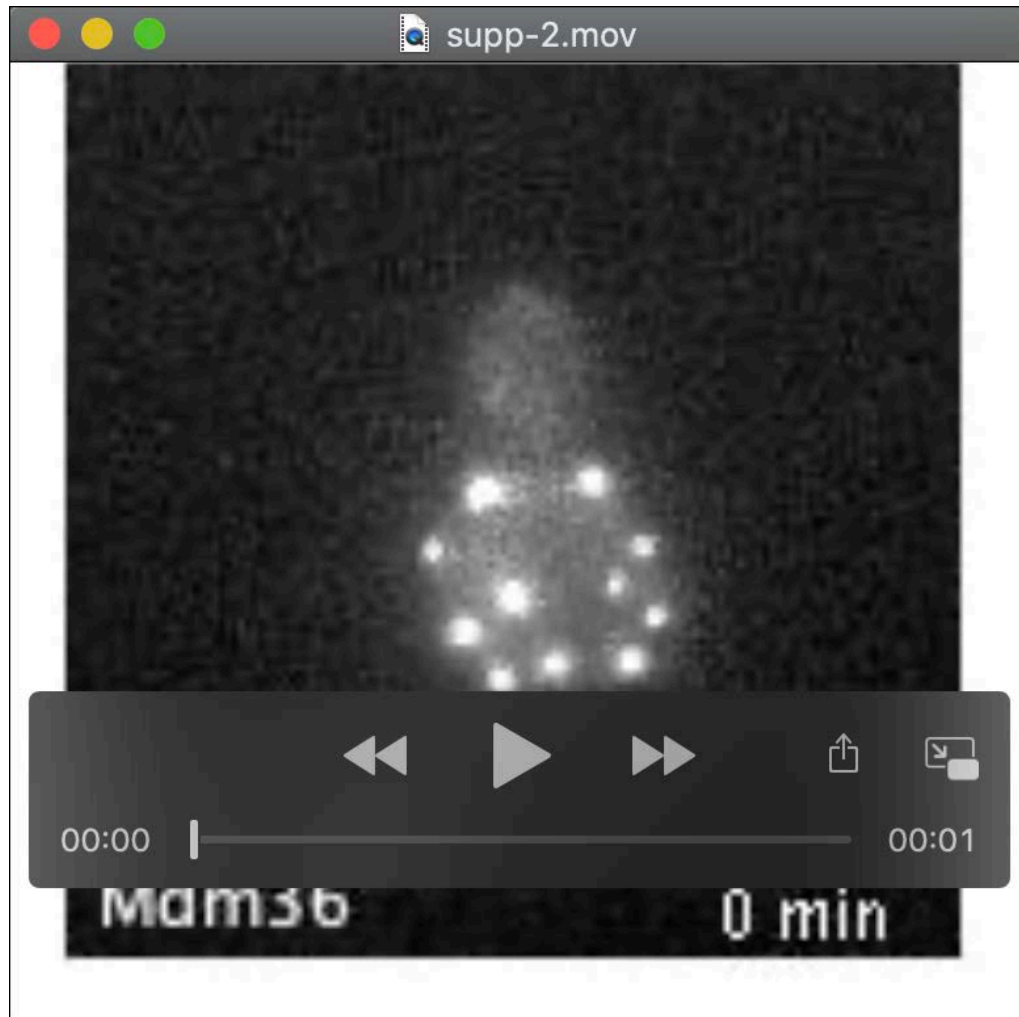

**Movie 1. Enhanced Num1 patches in Mdm36<sup>OX</sup> cells are stationary and remarkably stable.**

Time-lapse images of Num1-GFP in a Mdm36<sup>OX</sup> cell showing enhanced Num1 patches persisting for greater than two cell division cycles. Each frame is a maximum intensity projection of 9 optical sections spaced 0.5  $\mu\text{m}$  apart. Movie captured at 10 min intervals.

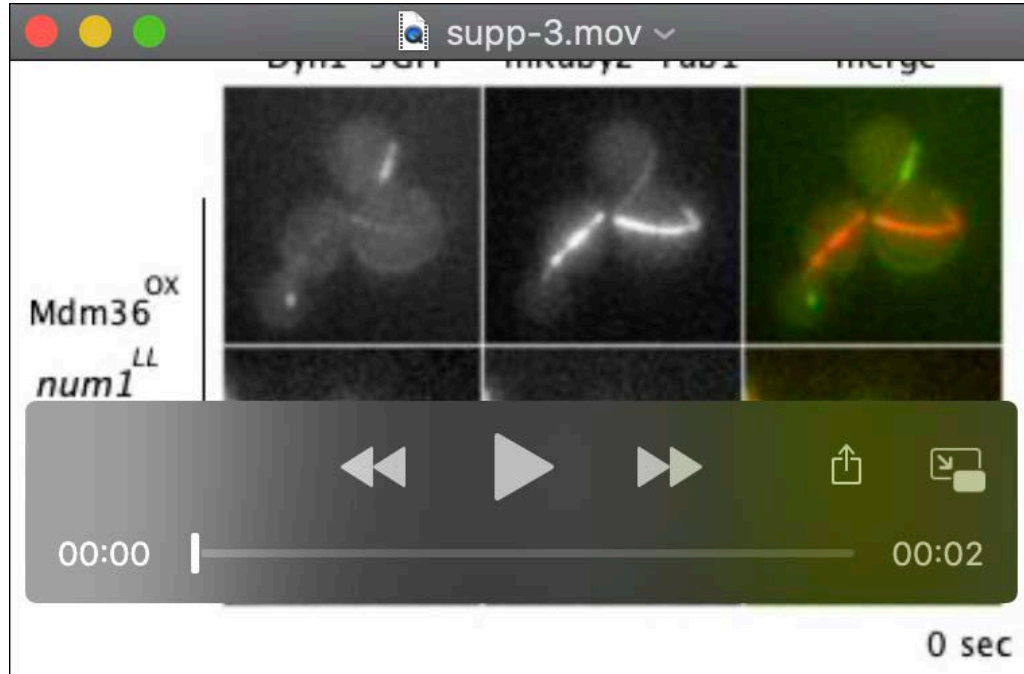

**Movie 2. Num1<sup>LL</sup> abolishes cortical localization of Dyn1-3GFP in Mdm36<sup>OX</sup> cells.** Time-lapse images of Dyn1-3GFP in Mdm36<sup>OX</sup> cells expressing mRuby2-Tub1 showing accumulation of dynein at the MT plus ends. No stationary cortical Dyn1-3GFP foci were observed. Each frame is a maximum intensity projection of 5 wide-field sections spaced 0.5  $\mu\text{m}$  apart. Movie captured at 10 s intervals.

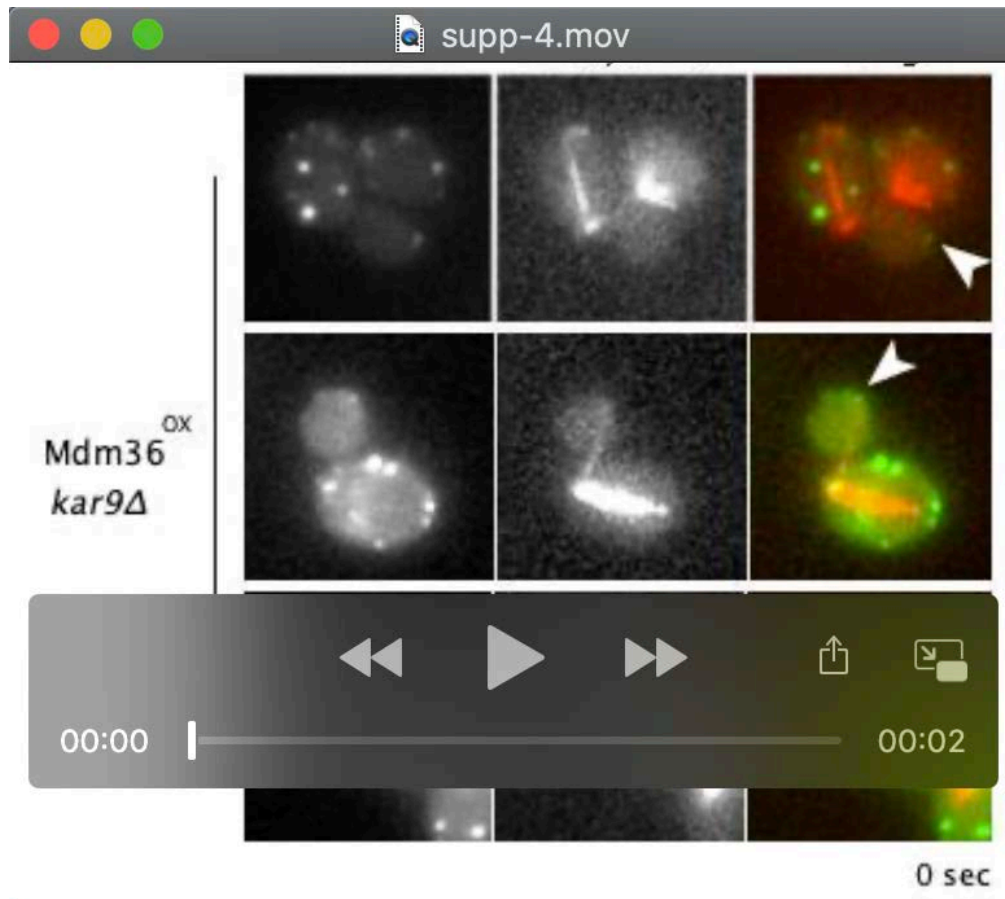

**Movie 3. MT sliding initiates at a dim Num1 patch.** Time-lapse images of Num1-GFP and mRuby2-Tub1 in *Mdm36<sup>OX</sup> kar9Δ* cells showing examples of MT sliding events initiated by the plus end contacting a dim Num1 patch (arrowheads) at the bud cortex, followed by spindle correction. Each frame is a maximum intensity projection of 5 wide-field sections spaced 0.5  $\mu\text{m}$  apart. Movie captured at 10 s intervals.

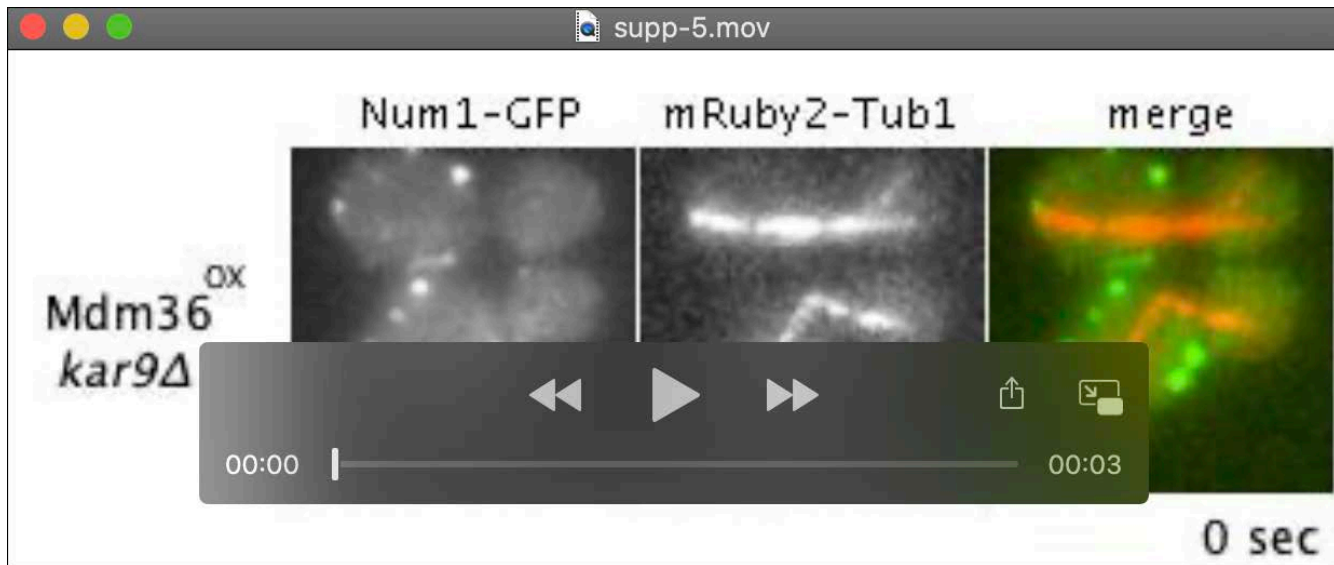

**Movie 4. MT sliding occurring at a bud cortical region without visible Num1-GFP.** Time-lapse images of Num1-GFP and mRuby2-Tub1 in Mdm36<sup>OX</sup> *kar9*Δ cells. Frames from 60 s to 80 s and from 130 s to 150 s show MT sliding along the bud cortex (arrows) for the bottom and top cells, respectively. Each frame is a maximum intensity projection of 5 wide-field images spaced 0.5 μm apart. Movie captured at 10 s intervals.

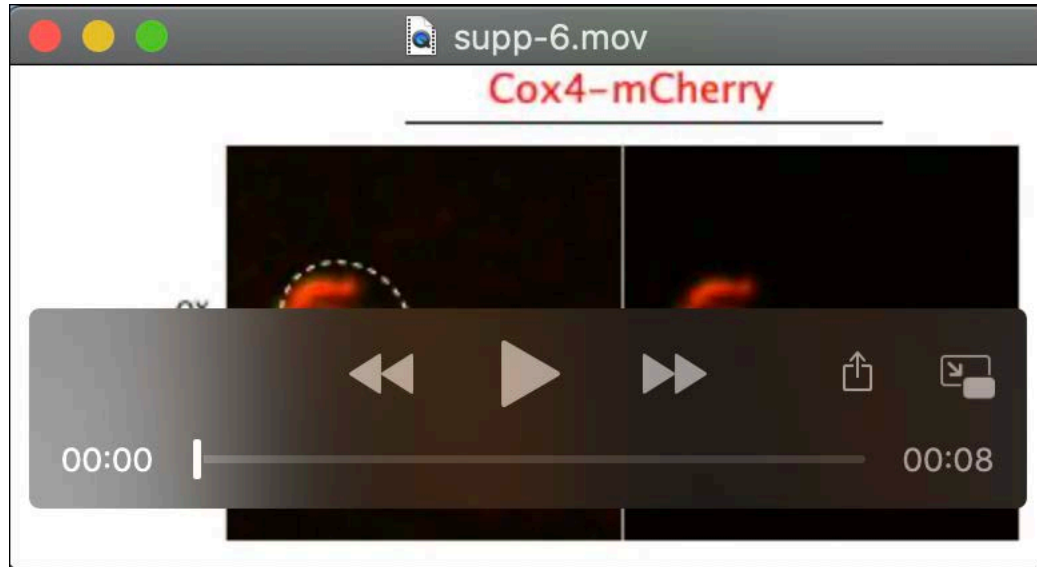

**Movie 5. Mdm36<sup>OX</sup> cells display branched and tubular mitochondrial network.** Full 3D reconstruction of a deconvolved wide-field image stack showing a cell expressing Num1-GFP and mitochondria-targeted Cox4-mCherry in the Mdm36<sup>OX</sup> background. Image stack consists of 11 optical sections spaced 0.5  $\mu\text{m}$  apart.

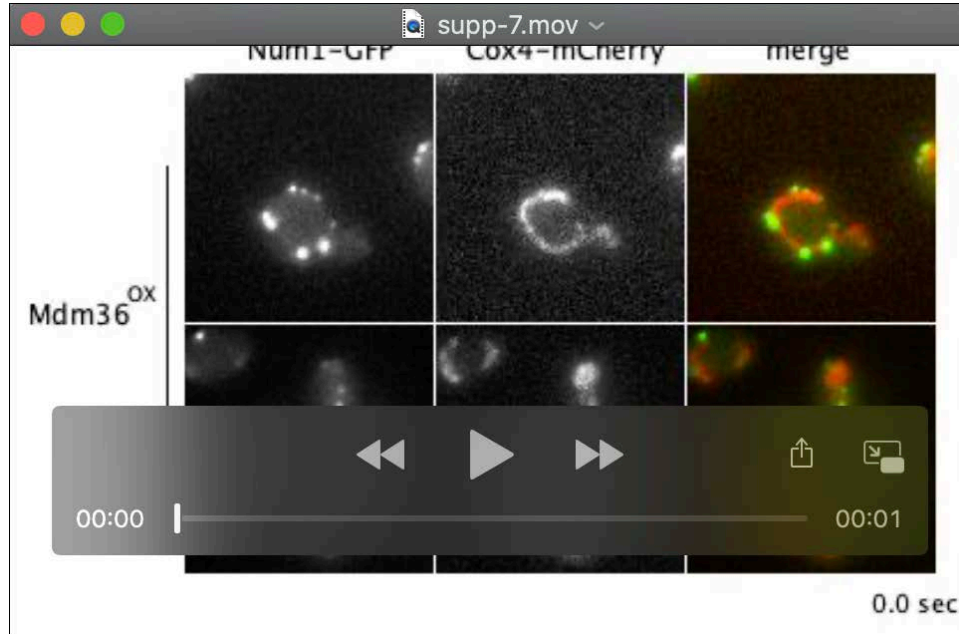

**Movie 6. Mdm36<sup>OX</sup> cells exhibit a persistent mitochondrial tethering phenotype.** Time-lapse images of Num1-GFP and Cox4-mCherry in Mdm36<sup>OX</sup> cells showing persistent tethering of mitochondria at the brightly enhanced cortical Num1 patches. Each frame is a maximum intensity projection of 5 wide-field sections spaced 0.5  $\mu\text{m}$  apart. Movie captured at 17.5 s intervals.

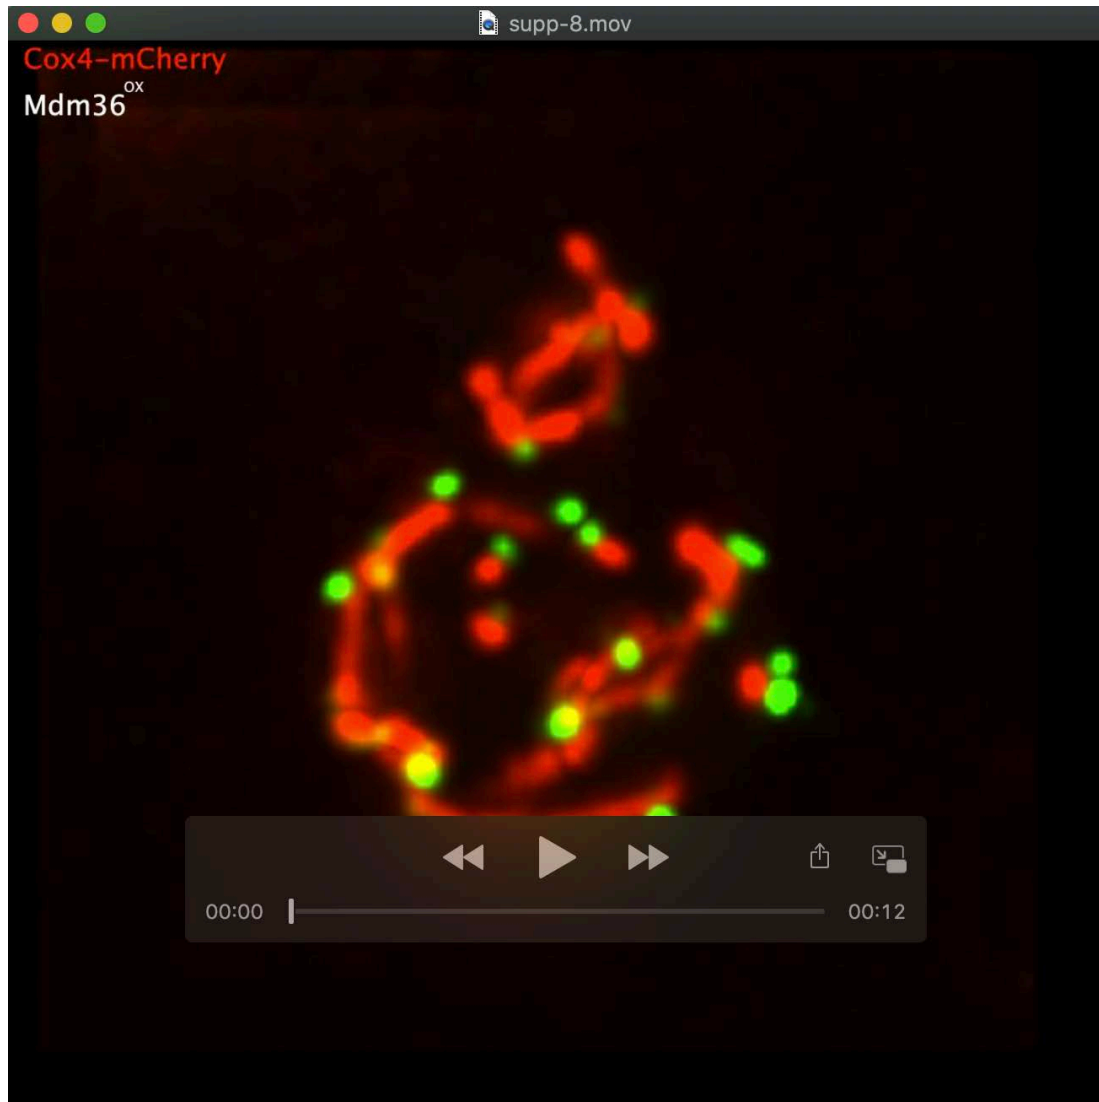

**Movie 7. Mitochondrial network is tethered by enhanced Num1 foci in Mdm36<sup>OX</sup> cells.** Full 3D reconstruction of a deconvolved wide-field image stack showing mitochondria association with every single enhanced Num1-GFP patches in a Mdm36<sup>OX</sup> cell. Mdm36 was overexpressed using a *MET3p:MDM36* plasmid integrated at the *leu2* locus. Image stack consists of 31 optical sections spaced 0.2  $\mu\text{m}$  apart encompassing the entire thickness of the cell.



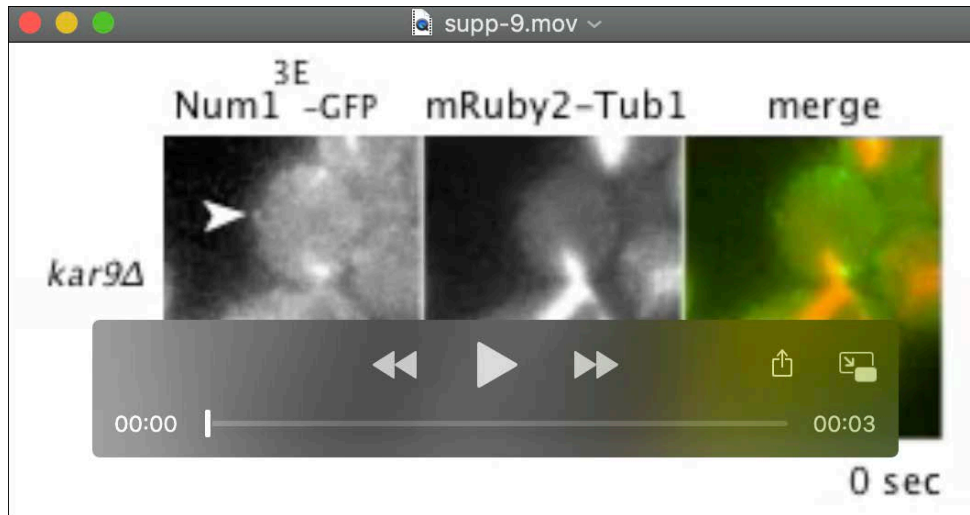

**Movie 8. MT sliding initiates at a dim Num1<sup>3E</sup> patch.** Time-lapse images of Num1<sup>3E</sup>-GFP and mRuby2-Tub1 in a *kar9Δ* cell. Frames at 0 s through 80 s show a dim cortical Num1<sup>3E</sup>-GFP patch (arrowhead) that photobleached in later frames. Frame at 130 s shows the plus end contacting the site of the dim Num1<sup>3E</sup>-GFP patch, followed by MT sliding in the subsequent frame. Each frame is a maximum intensity projection of 5 wide-field sections spaced 0.5 μm apart. Movie captured at 10 s intervals.
